# Supplementary material for: Investigating controls on fluvial grain sizes in post-glacial landscapes using citizen science
Source: Copernicus journal article supplement (doi:10.5194/esurf-14-95-2026), 2026-02-05
Supplement: Supplementary file 1 [file Supplementary Data Table S3.xlsx]

## Sheet: Sheet1
Erodibility Number	RCS_D	RCS_ORIGIN	Erodibility index
2	ALKALI-FELDSPAR-SYENITE	IGNEOUS	0.286
2	ALKALI-FELDSPAR-TRACHYTE	IGNEOUS	0.286
2	ANALCIME-GABBRO	IGNEOUS	0.286
2	ANALCIME-GABBRO AND PICRITE	IGNEOUS	0.286
2	ANALCIME-GABBRO, HORNBLENDE	IGNEOUS	0.286
2	ANALCIME-MICROGABBRO, OLIVINE	IGNEOUS	0.286
2	ANORTHOSITE	IGNEOUS	0.286
2	APLITIC MICROGRANITE AND LEUCOGRANITE	IGNEOUS	0.286
2	APPINITIC FELSIC ROCKS AND APPINITIC ULTRAMAFIC ROCKS	IGNEOUS	0.286
2	CAMPTONITE	IGNEOUS	0.286
2	CAMPTONITE AND MONCHIQUITE	IGNEOUS	0.286
2	CAMPTONITE, MONCHIQUITE AND OLIVINE BASALT	IGNEOUS	0.286
2	CAMPTONITE, MONCHIQUITE, BASALT AND BASANITE	IGNEOUS	0.286
2	DIORITE	IGNEOUS	0.286
2	DIORITE AND GABBRO	IGNEOUS	0.286
2	DIORITE AND MONZODIORITE	IGNEOUS	0.286
2	DIORITE, APPINITIC	IGNEOUS	0.286
2	DIORITE, AUGITE	IGNEOUS	0.286
2	DIORITE, FOLIATED	IGNEOUS	0.286
2	DIORITE, HORNBLENDE	IGNEOUS	0.286
2	DIORITE, OLIVINE	IGNEOUS	0.286
2	DIORITE, PYROXENE-MICA	IGNEOUS	0.286
2	DIORITIC-ROCK	IGNEOUS	0.286
2	DIORITIC-ROCK AND MICROGRANITE	IGNEOUS	0.286
2	DIORITIC-ROCK AND MONZONITIC-ROCK	IGNEOUS	0.286
2	DUNITE	IGNEOUS	0.286
2	FELDSPAR-PHYRIC HAWAIITE AND MUGEARITE	IGNEOUS	0.286
2	FELDSPAR-PORPHYRY	IGNEOUS	0.286
2	FELSIC-ROCK AND MAFIC-ROCK, HYBRIDISED	IGNEOUS	0.286
2	FELSITE	IGNEOUS	0.286
2	FELSITE AND GRANOPHYRIC GRANITE	IGNEOUS	0.286
2	FELSITE AND MICRODIORITIC-ROCK	IGNEOUS	0.286
2	FELSITE AND MICROGRANITIC ROCK	IGNEOUS	0.286
2	FELSITE AND QUARTZ-FELDSPAR PORPHYRY	IGNEOUS	0.286
2	FELSITE, ALBITE	IGNEOUS	0.286
2	FELSITE, ALBITISED	IGNEOUS	0.286
2	FELSITE, FOLIATED	IGNEOUS	0.286
2	FELSITE, FOLIATED-PORPHYRITIC	IGNEOUS	0.286
2	FELSITE, PORPHYRITIC	IGNEOUS	0.286
2	FELSITE, QUARTZ-ALBITE-PHYRIC	IGNEOUS	0.286
2	FELSITE, QUARTZ-PHYRIC	IGNEOUS	0.286
2	FELSITE, RIEBECKITE	IGNEOUS	0.286
2	FOLIATED MICRODIORITE AND FOLIATED PORPHYRITIC MICRODIORITE	IGNEOUS	0.286
2	FOLIATED TONALITE AND FOLIATED GRANODIORITE	IGNEOUS	0.286
2	GABBRO	IGNEOUS	0.286
2	GABBRO AND MICROGABBRO	IGNEOUS	0.286
2	GABBRO AND NORITE	IGNEOUS	0.286
2	GABBRO AND ULTRAMAFIC ROCK	IGNEOUS	0.286
2	GABBRO, BYTOWNITE	IGNEOUS	0.286
2	GABBRO, FLUXIONED	IGNEOUS	0.286
2	GABBRO, FOLIATED	IGNEOUS	0.286
2	GABBRO, HYPERSTHENE-BEARING	IGNEOUS	0.286
2	GABBRO, OLIVINE-GLOMEROCRYSTIC	IGNEOUS	0.286
2	GABBRO, PEGMATITIC	IGNEOUS	0.286
2	GABBRO, XENOLITHIC	IGNEOUS	0.286
2	GABBROIC-ROCK	IGNEOUS	0.286
2	GABBROIC-ROCK AND METASEDIMENTARY ROCK	IGNEOUS	0.286
2	GABBROIC-ROCK AND MICROGABBROIC-ROCK	IGNEOUS	0.286
2	GABBROIC-ROCK, APPINITIC	IGNEOUS	0.286
2	GABBROIC-ROCK, CONTAMINATED	IGNEOUS	0.286
2	GABBROIC-ROCK, MAGNETIC	IGNEOUS	0.286
2	GRANITE	IGNEOUS	0.286
2	GRANITE AND MICROGRANITE	IGNEOUS	0.286
2	GRANITE AND PORPHYRITIC GRANITE	IGNEOUS	0.286
2	GRANITE AND QUARTZ-MONZODIORITE	IGNEOUS	0.286
2	GRANITE, BIOTITE	IGNEOUS	0.286
2	GRANITE, BIOTITE-PHYRIC	IGNEOUS	0.286
2	GRANITE, FOLIATED	IGNEOUS	0.286
2	GRANITE, FOLIATED-BIOTITE	IGNEOUS	0.286
2	GRANITE, FOLIATED-MUSCOVITE-BIOTITE	IGNEOUS	0.286
2	GRANITE, GRANOPHYRIC	IGNEOUS	0.286
2	GRANITE, GRANOPHYRIC-PORPHYRITIC	IGNEOUS	0.286
2	GRANITE, MUSCOVITE-BIOTITE	IGNEOUS	0.286
2	GRANITE, PEGMATITIC	IGNEOUS	0.286
2	GRANITE, PEGMATITIC-MUSCOVITE-BIOTITE	IGNEOUS	0.286
2	GRANITE, PORPHYRITIC	IGNEOUS	0.286
2	GRANITIC-ROCK	IGNEOUS	0.286
2	GRANITIC-ROCK, FOLIATED	IGNEOUS	0.286
2	GRANITIC-ROCK, NEBULOSE	IGNEOUS	0.286
2	GRANODIORITE	IGNEOUS	0.286
2	GRANODIORITE AND APPINITIC DIORITE	IGNEOUS	0.286
2	GRANODIORITE AND DIORITE	IGNEOUS	0.286
2	GRANODIORITE AND QUARTZ-MONZODIORITE	IGNEOUS	0.286
2	GRANODIORITE WITH RAFTS OF PSAMMITE	IGNEOUS	0.286
2	GRANODIORITE WITH RAFTS OF SEMIPELITE	IGNEOUS	0.286
2	GRANODIORITE, BIOTITE	IGNEOUS	0.286
2	GRANODIORITE, DIORITE AND LEUCOGRANITE	IGNEOUS	0.286
2	GRANODIORITE, FOLIATED	IGNEOUS	0.286
2	GRANODIORITE, HORNBLENDE	IGNEOUS	0.286
2	GRANODIORITE, HORNBLENDE-BIOTITE	IGNEOUS	0.286
2	GRANODIORITE, K-FELDSPAR-MEGACRYSTIC-HORNBLENDE	IGNEOUS	0.286
2	GRANODIORITE, PORPHYRITIC	IGNEOUS	0.286
2	GRANOPHYRIC GRANITE AND GRANOPHYRIC MICROGRANITE	IGNEOUS	0.286
2	HARZBURGITE	IGNEOUS	0.286
2	HORNBLENDE GRANODIORITE AND MONZOGRANITE	IGNEOUS	0.286
2	HORNBLENDE-GABBRO	IGNEOUS	0.286
2	HORNBLENDE-GABBRO, WITH GRANITIC VEINS	IGNEOUS	0.286
2	HORNBLENDE-LAMPROPHYRE AND MICRODIORITE	IGNEOUS	0.286
2	HORNBLENDITE	IGNEOUS	0.286
2	IGNEOUS ROCK	IGNEOUS	0.286
2	IGNEOUS-ROCK, MAFIC	IGNEOUS	0.286
2	KERSANTITE	IGNEOUS	0.286
2	LAMPROPHYRE, FOLIATED	IGNEOUS	0.286
2	LAMPROPHYRE, FOLIATED-BIOTITE	IGNEOUS	0.286
2	LAMPROPHYRES	IGNEOUS	0.286
2	LAMPROPHYRES AND PORPHYRITIC MICRODIORITE	IGNEOUS	0.286
2	LEUCOGRANITE	IGNEOUS	0.286
2	LEUCOGRANITE AND QUARTZ-PORPHYRY	IGNEOUS	0.286
2	LEUCOGRANITE, FOLIATED	IGNEOUS	0.286
2	LEUCOGRANITE, PEGMATITIC	IGNEOUS	0.286
2	LEUCOGRANODIORITE	IGNEOUS	0.286
2	LEUCOMICRODIORITE	IGNEOUS	0.286
2	LEUCOMICROGRANODIORITE	IGNEOUS	0.286
2	LEUCOTONALITE	IGNEOUS	0.286
2	LEUCOTONALITE, PEGMATITIC	IGNEOUS	0.286
2	LEUCOTONALITE, TONALITE AND GRANODIORITE	IGNEOUS	0.286
2	MAFITE	IGNEOUS	0.286
2	MELADIORITE	IGNEOUS	0.286
2	MELADIORITE, HORNBLENDE	IGNEOUS	0.286
2	MELADIORITE, MELAMONZONITE AND MELASYENITE	IGNEOUS	0.286
2	MELAGABBRO	IGNEOUS	0.286
2	MELAGRANITE	IGNEOUS	0.286
2	MELAGRANITE, BIOTITE	IGNEOUS	0.286
2	MELAGRANITE, PEGMATITIC-BIOTITE	IGNEOUS	0.286
2	MELAGRANODIORITE	IGNEOUS	0.286
2	MELAMICRODIORITE	IGNEOUS	0.286
2	MELAMICRODIORITE, FOLIATED	IGNEOUS	0.286
2	MELAMICROGABBRO, OLIVINE	IGNEOUS	0.286
2	MELAMONZONITE, OLIVINE	IGNEOUS	0.286
2	MELATROCTOLITE, PERIDOTITE AND DUNITE	IGNEOUS	0.286
2	MICRODIORITE	IGNEOUS	0.286
2	MICRODIORITE AND APPINITIC DIORITIC-ROCK	IGNEOUS	0.286
2	MICRODIORITE AND LAMPROPHYRE	IGNEOUS	0.286
2	MICRODIORITE AND PORPHYRITIC MICRODIORITE	IGNEOUS	0.286
2	MICRODIORITE, FELDSPAR-PHYRIC	IGNEOUS	0.286
2	MICRODIORITE, FOLIATED	IGNEOUS	0.286
2	MICRODIORITE, FOLIATED-PORPHYRITIC	IGNEOUS	0.286
2	MICRODIORITE, HORNBLENDE	IGNEOUS	0.286
2	MICRODIORITE, HORNBLENDE-PHYRIC	IGNEOUS	0.286
2	MICRODIORITE, PORPHYRITIC	IGNEOUS	0.286
2	MICRODIORITE, PYROXENE-BEARING	IGNEOUS	0.286
2	MICRODIORITIC-ROCK	IGNEOUS	0.286
2	MICROGABBRO	IGNEOUS	0.286
2	MICROGABBRO AND CAMPTONITE	IGNEOUS	0.286
2	MICROGABBRO, OLIVINE-CLINOPYROXENE-MACROPHYRIC	IGNEOUS	0.286
2	MICROGABBRO, OLIVINE-MACROPHYRIC	IGNEOUS	0.286
2	MICROGABBRO, PLAGIOCLASE-MICROPHYRIC	IGNEOUS	0.286
2	MICROGABBRO, PLAGIOCLASE-OLIVINE-CLINOPYROXENE-MACROPHYRIC	IGNEOUS	0.286
2	MICROGABBRO, PLAGIOCLASE-OLIVINE-MICROPHYRIC	IGNEOUS	0.286
2	MICROGABBRO, PLAGIOCLASE-PHYRIC	IGNEOUS	0.286
2	MICROGABBRO, PORPHYRITIC	IGNEOUS	0.286
2	MICROGABBRO, THOLEIITIC	IGNEOUS	0.286
2	MICROGABBRO, VARIOLITIC	IGNEOUS	0.286
2	MICROGABBROIC-ROCK	IGNEOUS	0.286
2	MICROGRANITE	IGNEOUS	0.286
2	MICROGRANITE AND PORPHYRITIC MICROGRANITE	IGNEOUS	0.286
2	MICROGRANITE, APLITIC	IGNEOUS	0.286
2	MICROGRANITE, APLITIC-FOLIATED	IGNEOUS	0.286
2	MICROGRANITE, APLITIC-PORPHYRITIC	IGNEOUS	0.286
2	MICROGRANITE, FELDSPAR-PHYRIC	IGNEOUS	0.286
2	MICROGRANITE, FOLIATED	IGNEOUS	0.286
2	MICROGRANITE, GRANOPHYRIC	IGNEOUS	0.286
2	MICROGRANITE, PORPHYRITIC	IGNEOUS	0.286
2	MICROGRANITE, PORPHYRITIC-FOLIATED	IGNEOUS	0.286
2	MICROGRANITIC-ROCK	IGNEOUS	0.286
2	MICROGRANODIORITE	IGNEOUS	0.286
2	MICROGRANODIORITE AND QUARTZ-MICRODIORITE	IGNEOUS	0.286
2	MICROGRANODIORITE, FOLIATED-FELDSPAR-PHYRIC	IGNEOUS	0.286
2	MICROGRANODIORITE, FOLIATED-PORPHYRITIC	IGNEOUS	0.286
2	MICROGRANODIORITE, MICRODIORITE AND ANDESITE	IGNEOUS	0.286
2	MICROGRANODIORITE, PLAGIOCLASE-PHYRIC	IGNEOUS	0.286
2	MICROGRANODIORITE, PORPHYRITIC	IGNEOUS	0.286
2	MICROMONZODIORITE	IGNEOUS	0.286
2	MICROMONZOGRANITE, PORPHYRITIC	IGNEOUS	0.286
2	MICROSYENITE	IGNEOUS	0.286
2	MICROSYENITIC-ROCK	IGNEOUS	0.286
2	MICROTONALITE	IGNEOUS	0.286
2	MINETTE	IGNEOUS	0.286
2	MONCHIQUITE	IGNEOUS	0.286
2	MONCHIQUITE, NEPHELINE	IGNEOUS	0.286
2	MONZODIORITE	IGNEOUS	0.286
2	MONZOGRANITE	IGNEOUS	0.286
2	MONZOGRANITE, BIOTITE	IGNEOUS	0.286
2	MONZOGRANITE, PORPHYRITIC	IGNEOUS	0.286
2	MONZONITE	IGNEOUS	0.286
2	MONZONITE, FOLIATED	IGNEOUS	0.286
2	MONZONITE, OLIVINE	IGNEOUS	0.286
2	NORITE	IGNEOUS	0.286
2	NORITE AND GABBRO	IGNEOUS	0.286
2	NORITE AND GABBRONORITE	IGNEOUS	0.286
2	NORITE, QUARTZ-BIOTITE	IGNEOUS	0.286
2	OLIVINE MONZONITE AND OLIVINE MONZODIORITE	IGNEOUS	0.286
2	OLIVINE-GABBRO	IGNEOUS	0.286
2	OLIVINE-GABBRO AND NORITE	IGNEOUS	0.286
2	OLIVINE-GABBRO AND OLIVINE-GABBRONORITE	IGNEOUS	0.286
2	OLIVINE-GABBRO AND ORTHOPYROXENE-GABBRO	IGNEOUS	0.286
2	OLIVINE-GABBRO AND TROCTOLITE	IGNEOUS	0.286
2	OLIVINE-GABBRO, FE-RICH	IGNEOUS	0.286
2	OLIVINE-GABBRO, PORPHYRITIC	IGNEOUS	0.286
2	OLIVINE-HORNBLENDITE	IGNEOUS	0.286
2	OLIVINE-MICROGABBRO	IGNEOUS	0.286
2	OLIVINE-MICROGABBRO AND OLIVINE-BASALT	IGNEOUS	0.286
2	OLIVINE-NORITE	IGNEOUS	0.286
2	OLIVINE-PYROXENITE	IGNEOUS	0.286
2	ORTHOPYROXENE-GABBRO	IGNEOUS	0.286
2	ORTHOPYROXENE-GABBRO AND CLINOPYROXENE-NORITE	IGNEOUS	0.286
2	ORTHOPYROXENITE	IGNEOUS	0.286
2	PEGMATITE	IGNEOUS	0.286
2	PEGMATITE AND GRANITE	IGNEOUS	0.286
2	PEGMATITE AND LEUCOGRANITE	IGNEOUS	0.286
2	PEGMATITE AND PEGMATITIC MICROGRANITE	IGNEOUS	0.286
2	PEGMATITE, BRECCIATED-FELDSPAR-QUARTZ	IGNEOUS	0.286
2	PEGMATITE, FELDSPAR-QUARTZ	IGNEOUS	0.286
2	PEGMATITE, FOLIATED	IGNEOUS	0.286
2	PEGMATITE, FOLIATED-FELDSPAR-QUARTZ	IGNEOUS	0.286
2	PEGMATITIC GRANITE AND APLITIC MICROGRANITE	IGNEOUS	0.286
2	PERIDOTITE	IGNEOUS	0.286
2	PERIDOTITE AND MELATROCTOLITE	IGNEOUS	0.286
2	PERIDOTITE AND MELATROCTOLITE (INTRUSION BRECCIA)	IGNEOUS	0.286
2	PERIDOTITE AND PYROXENITE	IGNEOUS	0.286
2	PERIDOTITE AND SERPENTINITE	IGNEOUS	0.286
2	PERIDOTITE AND TROCTOLITE	IGNEOUS	0.286
2	PERIDOTITE, FELDSPATHIC	IGNEOUS	0.286
2	PICRITE	IGNEOUS	0.286
2	PICROBASALT	IGNEOUS	0.286
2	PORPHYRITIC GRANODIORITE AND MICRODIORITE	IGNEOUS	0.286
2	PORPHYRITIC TONALITE AND PORPHYRITIC GRANODIORITE	IGNEOUS	0.286
2	PORPHYRY	IGNEOUS	0.286
2	PORPHYRY, BIOTITE-FELDSPAR	IGNEOUS	0.286
2	PSEUDOLEUCITE-SYENITE	IGNEOUS	0.286
2	PYROXENE DIORITE AND MONZONITE	IGNEOUS	0.286
2	PYROXENE DIORITE, TONALITE AND GRANODIORITE	IGNEOUS	0.286
2	PYROXENE-ROCK, APPINITIC-BIOTITE	IGNEOUS	0.286
2	PYROXENITE	IGNEOUS	0.286
2	PYROXENITE, BIOTITE	IGNEOUS	0.286
2	QUARTZ (VEIN)	MINERAL VEIN	0.286
2	QUARTZ-DIORITE	IGNEOUS	0.286
2	QUARTZ-DIORITE, FOLIATED	IGNEOUS	0.286
2	QUARTZ-DOLERITE AND MICROGRANITE	IGNEOUS	0.286
2	QUARTZ-FELDSPAR-PORPHYRY	IGNEOUS	0.286
2	QUARTZ-GABBRO	IGNEOUS	0.286
2	QUARTZ-GARNET-MAGNETITE-ROCK	IGNEOUS	0.286
2	QUARTZ-MICRODIORITE	IGNEOUS	0.286
2	QUARTZ-MICROGABBRO	IGNEOUS	0.286
2	QUARTZ-MICROMONZODIORITE	IGNEOUS	0.286
2	QUARTZ-MICROSYENITE	IGNEOUS	0.286
2	QUARTZ-MONZODIORITE	IGNEOUS	0.286
2	QUARTZ-MONZONITE	IGNEOUS	0.286
2	QUARTZ-PORPHYRY	IGNEOUS	0.286
2	QUARTZ-SYENITE	IGNEOUS	0.286
2	QUARTZ-TRACHYTE	IGNEOUS	0.286
2	RHYOLITE	IGNEOUS	0.286
2	RHYOLITE (TAS) AND RHYOLITIC LAPILLI-TUFF	IGNEOUS	0.286
2	RHYOLITE AND DACITE	IGNEOUS	0.286
2	RHYOLITE, PERALKALINE	IGNEOUS	0.286
2	RHYOLITE, PORPHYRITIC	IGNEOUS	0.286
2	RHYOLITIC LAVA AND RHYOLITIC TUFF	IGNEOUS	0.286
2	RHYOLITIC-ROCK, BIOTITE-PHYRIC	IGNEOUS	0.286
2	SERPENTINITE	IGNEOUS	0.286
2	SPESSARTITE	IGNEOUS	0.286
2	SYENITE	IGNEOUS	0.286
2	SYENITIC-ROCK	IGNEOUS	0.286
2	TALC-ROCK	IGNEOUS	0.286
2	TONALITE	IGNEOUS	0.286
2	TONALITE AND DIORITE	IGNEOUS	0.286
2	TONALITE AND QUARTZ-DIORITE	IGNEOUS	0.286
2	TONALITE, FOLIATED	IGNEOUS	0.286
2	TONALITE, PEGMATITIC	IGNEOUS	0.286
2	TRACHYANDESITE	IGNEOUS	0.286
2	TRACHYANDESITE, FELDSPAR-MACROPORPHYRITIC	IGNEOUS	0.286
2	TRACHYBASALT	IGNEOUS	0.286
2	TRACHYBASALT AND BASALT	IGNEOUS	0.286
2	TRACHYTE	IGNEOUS	0.286
2	TRACHYTE, BIOTITE	IGNEOUS	0.286
2	TRACHYTE, BIOTITE, PHONOLITIC	IGNEOUS	0.286
2	TRACHYTIC AGGLOMERATE AND BASALTIC AGGLOMERATE	IGNEOUS	0.286
2	TRACHYTIC-ROCK	IGNEOUS	0.286
2	TROCTOLITE	IGNEOUS	0.286
2	TROCTOLITE, BYTOWNITE	IGNEOUS	0.286
2	ULTRAMAFIC-ROCK	IGNEOUS	0.286
2	ULTRAMAFIC-ROCK AND GABBROIC-ROCK	IGNEOUS	0.286
2	ULTRAMAFIC-ROCK, FOLIATED	IGNEOUS	0.286
2	ULTRAMAFITITE	IGNEOUS	0.286
2	VOGESITE	IGNEOUS	0.286
2	WEBSTERITE	IGNEOUS	0.286
2	GRANITE AND GNEISSOSE GRANITE	IGNEOUS AND METAMORPHIC	0.286
2.5	BASALT AND MICROGABBRO	IGNEOUS	0.357
2.5	MICRODIORITE AND ANDESITE	IGNEOUS	0.357
2.5	MICRODIORITE, ANDESITE AND DIORITE	IGNEOUS	0.357
2.5	MICROGABBRO AND BASALT	IGNEOUS	0.357
2.5	MICROGABBRO AND FELDSPAR-PHYRIC BASALT	IGNEOUS	0.357
2.5	MICROGABBRO AND GABBRO	IGNEOUS	0.357
2.5	MICROGABBRO, BASALT AND ANALCIME-GABBRO	IGNEOUS	0.357
2.5	MICROGABBRO, BASALT AND BASALTIC ANDESITE	IGNEOUS	0.357
2.5	MICROGABBRO, BASALT AND GLASSY ANDESITE	IGNEOUS	0.357
2.5	THOLEIITIC MICROGABBRO AND THOLEIITIC BASALT	IGNEOUS	0.357
2.5	TRACHYTE AND ANDESITIC-ROCK	IGNEOUS	0.357
2	DIORITE, GNEISSOSE	METAMORPHIC	0.381
2	GNEISS	METAMORPHIC	0.381
2	GNEISS AND AMPHIBOLITE	METAMORPHIC	0.381
2	GNEISS, HORNBLENDE-BIOTITE	METAMORPHIC	0.381
2	GNEISS, K-FELDSPAR-AUGEN	METAMORPHIC	0.381
2	GNEISS, MICROCLINE-PLAGIOCLASE	METAMORPHIC	0.381
2	GNEISS, MICROCLINE-PORPHYROBLASTIC	METAMORPHIC	0.381
2	GNEISS, NEBULITIC	METAMORPHIC	0.381
2	GNEISS, PLAGIOCLASE	METAMORPHIC	0.381
2	GNEISS, PROTOMYLONITIC	METAMORPHIC	0.381
2	GNEISS, PYROXENE-BEARING	METAMORPHIC	0.381
2	GNEISS, QUARTZOFELDSPATHIC	METAMORPHIC	0.381
2	GNEISS, RE-METAMORPHOSED	METAMORPHIC	0.381
2	GNEISSOSE GRANITE AND PEGMATITE	METAMORPHIC	0.381
2	GNEISSOSE PELITE AND GNEISSOSE SEMIPELITE	METAMORPHIC	0.381
2	GNEISSOSE PELITE AND QUARTZITE	METAMORPHIC	0.381
2	GNEISSOSE PSAMMITE AND GNEISSOSE PELITE	METAMORPHIC	0.381
2	GNEISSOSE PSAMMITE AND GNEISSOSE SEMIPELITE	METAMORPHIC	0.381
2	GNEISSOSE PSAMMITE AND GNEISSOSE-MICACEOUS PSAMMITE	METAMORPHIC	0.381
2	GNEISSOSE PSAMMITE AND GRANOFELSIC SEMIPELITE	METAMORPHIC	0.381
2	GNEISSOSE QUARTZITE AND GNEISSOSE SEMIPELITE	METAMORPHIC	0.381
2	GNEISSOSE SEMIPELITE AND GNEISSOSE PELITE	METAMORPHIC	0.381
2	GNEISSOSE SEMIPELITE AND GNEISSOSE PSAMMITE	METAMORPHIC	0.381
2	GNEISSOSE SEMIPELITE, PELITE AND CALCSILICATE-ROCK	METAMORPHIC	0.381
2	ORTHOGNEISS	METAMORPHIC	0.381
2	ORTHOGNEISS, ALKALI-FELDSPAR	METAMORPHIC	0.381
2	ORTHOGNEISS, FELSIC	METAMORPHIC	0.381
2	ORTHOGNEISS, HORNBLENDE-BEARING	METAMORPHIC	0.381
2	ORTHOGNEISS, MAFIC	METAMORPHIC	0.381
2	ORTHOGNEISS, MYLONITIC	METAMORPHIC	0.381
2	PARAGNEISS	METAMORPHIC	0.381
2	SERPENTINITE AND TREMOLITE SCHIST	METAMORPHIC	0.381
3	AGGLOMERATE	IGNEOUS	0.429
3	AGGLOMERATE, BASALTIC	IGNEOUS	0.429
3	AGGLOMERATE, RHYOLITIC	IGNEOUS	0.429
3	AGGLOMERATE, TRACHYTIC	IGNEOUS	0.429
3	ANDESITE	IGNEOUS	0.429
3	ANDESITE AND BASALT	IGNEOUS	0.429
3	ANDESITE AND BASALTIC ANDESITE	IGNEOUS	0.429
3	ANDESITE, AUGITE	IGNEOUS	0.429
3	ANDESITE, HYPERSTHENE	IGNEOUS	0.429
3	ANDESITE, PORPHYRITIC	IGNEOUS	0.429
3	ANDESITE, PYROXENE	IGNEOUS	0.429
3	ANDESITE, PYROXENE-PLAGIOCLASE-PHYRIC	IGNEOUS	0.429
3	ANDESITE, THOLEIITIC	IGNEOUS	0.429
3	ANDESITIC TUFF, MAFIC TUFF AND AGGLOMERATE	IGNEOUS	0.429
3	ANDESITIC-ROCK	IGNEOUS	0.429
3	BASALT	IGNEOUS	0.429
3	BASALT AND ANDESITE	IGNEOUS	0.429
3	BASALT AND BASALTIC ANDESITE	IGNEOUS	0.429
3	BASALT AND BASALTIC LAVA	IGNEOUS	0.429
3	BASALT AND FELSITE [COMPOSITE INTRUSION]	IGNEOUS	0.429
3	BASALT AND HAWAIITE	IGNEOUS	0.429
3	BASALT, FELDSPAR-PHYRIC	IGNEOUS	0.429
3	BASALT, GLASSY	IGNEOUS	0.429
3	BASALT, HAWAIITE AND MUGEARITE	IGNEOUS	0.429
3	BASALT, LAVA-PILLOWED	IGNEOUS	0.429
3	BASALT, MACROPHYRIC	IGNEOUS	0.429
3	BASALT, MICROPORPHYRITIC	IGNEOUS	0.429
3	BASALT, OLIVINE-CLINOPYROXENE-MICROPHYRIC	IGNEOUS	0.429
3	BASALT, OLIVINE-MACROPHYRIC	IGNEOUS	0.429
3	BASALT, PLAGIOCLASE-OLIVINE-CLINOPYROXENE-MACROPHYRIC	IGNEOUS	0.429
3	BASALT, PYROXENE-PHYRIC	IGNEOUS	0.429
3	BASALTIC ANDESITE AND FELSITE	IGNEOUS	0.429
3	BASALTIC ANDESITE AND RHYOLITE	IGNEOUS	0.429
3	BASALTIC LAVA AND ANDESITIC LAVA	IGNEOUS	0.429
3	BASALTIC LAVA AND BASALTIC TUFF	IGNEOUS	0.429
3	BASALTIC LAVA AND MUGEARITE	IGNEOUS	0.429
3	BASALTIC LAVA AND VOLCANICLASTIC-BRECCIA	IGNEOUS	0.429
3	BASALTIC LAVA, OLIVINE-BASALT AND ANGULAR PEBBLE-GRADE CONGLOMERATE	IGNEOUS	0.429
3	BASALTIC ROCK AND HAWAIITE	IGNEOUS	0.429
3	BASALTIC TUFF AND BASALTIC LAVA	IGNEOUS	0.429
3	BASALTIC-ANDESITE (TAS)	IGNEOUS	0.429
3	BASALTIC-ROCK	IGNEOUS	0.429
3	BASALTIC-ROCK, OLIVINE-CLINOPYROXENE-MACROPHYRIC	IGNEOUS	0.429
3	BASALTIC-ROCK, PLAGIOCLASE-MACROPHYRIC	IGNEOUS	0.429
3	BASALTIC-ROCK, PLAGIOCLASE-MICROPHYRIC	IGNEOUS	0.429
3	BASALTIC-ROCK, PLAGIOCLASE-OLIVINE-CLINOPYROXENE-MACROPHYRIC	IGNEOUS	0.429
3	BASALTIC-ROCK, PLAGIOCLASE-OLIVINE-MICROPHYRIC	IGNEOUS	0.429
3	BASANITE	IGNEOUS	0.429
3	BASANITE, ANALCIME	IGNEOUS	0.429
3	BASANITE, BIOTITE	IGNEOUS	0.429
3	BASANITE, NEPHELINE	IGNEOUS	0.429
3	BENMOREITE	IGNEOUS	0.429
3	BRECCIA	IGNEOUS	0.429
3	BRECCIA, QUARTZ (VEIN)	IGNEOUS	0.429
3	CARBONATITE	IGNEOUS	0.429
3	DACITE	IGNEOUS	0.429
3	DACITIC-ROCK	IGNEOUS	0.429
3	GLASSY BASALT AND GLASSY ANDESITE	IGNEOUS	0.429
3	GLASSY MICROGABBRO, GLASSY BASALT AND GLASSY ANDESITE	IGNEOUS	0.429
3	HAWAIITE	IGNEOUS	0.429
3	HAWAIITE AND MUGEARITE	IGNEOUS	0.429
3	HAWAIITE, APHYRIC	IGNEOUS	0.429
3	HAWAIITE, FELDSPAR-PHYRIC	IGNEOUS	0.429
3	HAWAIITE, OLIVINE-PHYRIC	IGNEOUS	0.429
3	HORNBLENDE-ANDESITE, LAVA	IGNEOUS	0.429
3	HYALOCLASTITE	IGNEOUS	0.429
3	INTRUSION-BRECCIA	IGNEOUS	0.429
3	INTRUSION-BRECCIA AND TUFFISITE	IGNEOUS	0.429
3	LATITE	IGNEOUS	0.429
3	LAVA	IGNEOUS	0.429
3	LAVA AND TUFF	IGNEOUS	0.429
3	LAVA, ANDESITIC	IGNEOUS	0.429
3	LAVA, AUGITE-ANDESITE	IGNEOUS	0.429
3	LAVA, BASALT	IGNEOUS	0.429
3	LAVA, BASALTIC	IGNEOUS	0.429
3	LAVA, BASALTIC-TRACHYANDESITE	IGNEOUS	0.429
3	LAVA, FELSIC	IGNEOUS	0.429
3	LAVA, MAFIC	IGNEOUS	0.429
3	MAGMATIC-BRECCIA	IGNEOUS	0.429
3	MUGEARITE	IGNEOUS	0.429
3	MUGEARITE AND BENMOREITE	IGNEOUS	0.429
3	MUGEARITE AND TRACHYTE	IGNEOUS	0.429
3	MUGEARITE, FELDSPAR-PHYRIC	IGNEOUS	0.429
3	NEPHELINE-MICROSYENITE	IGNEOUS	0.429
3	NEPHELINE-MONZOGABBRO	IGNEOUS	0.429
3	NEPHELINE-SYENITE	IGNEOUS	0.429
3	OLIVINE-BASALT	IGNEOUS	0.429
3	PHONOLITE	IGNEOUS	0.429
3	PITCHSTONE	IGNEOUS	0.429
3	PITCHSTONE, ANDESITIC	IGNEOUS	0.429
3	PITCHSTONE, PORPHYRITIC-RHYOLITIC	IGNEOUS	0.429
3	PYROCLASTIC-BRECCIA	IGNEOUS	0.429
3	PYROCLASTIC-BRECCIA, BASALTIC	IGNEOUS	0.429
3	PYROCLASTIC-BRECCIA, TRACHYTIC	IGNEOUS	0.429
3	PYROCLASTIC-ROCK	IGNEOUS	0.429
3	PYROCLASTIC-ROCK, BASALTIC	IGNEOUS	0.429
3	PYROCLASTIC-ROCK, POORLY-SORTED (IGNIMBRITE)	IGNEOUS	0.429
3	PYROCLASTIC-ROCK, RHYOLITIC	IGNEOUS	0.429
3	TUFF	IGNEOUS	0.429
3	TUFF AND AGGLOMERATE	IGNEOUS	0.429
3	TUFF AND TUFFITE	IGNEOUS	0.429
3	TUFF, ANDESITIC	IGNEOUS	0.429
3	TUFF, BASALTIC	IGNEOUS	0.429
3	TUFF, DACITIC	IGNEOUS	0.429
3	TUFF, FELSIC	IGNEOUS	0.429
3	TUFF, RHYOLITIC	IGNEOUS	0.429
3	TUFF, TRACHYTIC	IGNEOUS	0.429
3	TUFF, VOLCANICLASTIC-IGNEOUS-ROCK AND BASALTIC LAVA	IGNEOUS	0.429
3	TUFFISITE	IGNEOUS	0.429
3	VOLCANICLASTIC-BRECCIA	IGNEOUS	0.429
3	VOLCANICLASTIC-BRECCIA, BASALTIC	IGNEOUS	0.429
3	VOLCANICLASTIC-SANDSTONE	IGNEOUS	0.429
3	VOLCANICLASTIC-SANDSTONE AND VOLCANICLASTIC-BRECCIA	IGNEOUS	0.429
2	GNEISSOSE PSAMMITE AND AMPHIBOLITE	METAMORPHIC	0.476
2	METAPERIDOTITE	METAMORPHIC	0.476
2	METAPICRITE	METAMORPHIC	0.476
3	ORTHOGNEISS AND METASEDIMENTARY ROCK	METAMORPHIC AND SEDIMENTARY	0.476
2	AMPHIBOLITE	METAMORPHIC	0.571
2	AMPHIBOLITE AND MAFIC ORTHOGNEISS	METAMORPHIC	0.571
2	AMPHIBOLITE AND PYROXENE GRANOFELS	METAMORPHIC	0.571
2	AMPHIBOLITE, FOLIATED	METAMORPHIC	0.571
2	AMPHIBOLITE, HORNBLENDE-SCHIST AND METAGABBRO	METAMORPHIC	0.571
2	AMPHIBOLITE, QUARTZ-XENOLITHIC	METAMORPHIC	0.571
2	AMPHIBOLITE, SCHISTOSE	METAMORPHIC	0.571
3	HORNBLENDITE	METAMORPHIC	0.571
3	HORNFELS	METAMORPHIC	0.571
2	MARBLE AND CALCSILICATE-ROCK	METAMORPHIC	0.571
2	ORTHO-AMPHIBOLITE	METAMORPHIC	0.571
2	PARA-AMPHIBOLITE	METAMORPHIC	0.571
2	QUARTZITE	METAMORPHIC	0.571
2	GRANOFELSIC PSAMMITE AND GRANOFELSIC SEMIPELITE	METAMORPHIC	0.619
3	HORNBLENDE SCHIST AND GNEISSOSE GRANITE	METAMORPHIC	0.619
3	HORNBLENDE SCHIST AND GNEISSOSE PSAMMITE	METAMORPHIC	0.619
3	BASALT, HORNFELSED	METAMORPHIC	0.667
2	GRANOFELS WITH CALCSILICATE-ROCK AND PSAMMITE	METAMORPHIC	0.667
2	GRANOFELS, CALCSILICATE-ROCK AND GRANOFELSIC SEMIPELITE	METAMORPHIC	0.667
2	GRANOFELS, CALCSILICATE-ROCK AND QUARTZITE	METAMORPHIC	0.667
2	MAGNETITE-GARNET-HYPERSTHENE-ROCK, SCHISTOSE	METAMORPHIC	0.667
3	MARBLE	METAMORPHIC	0.667
2	META-ULTRAMAFITITE	METAMORPHIC	0.667
2	METABARITE-STONE	METAMORPHIC	0.667
2	METADIORITE	METAMORPHIC	0.667
2	METADIORITE AND METATONALITE	METAMORPHIC	0.667
2	METADIORITE, GNEISSOSE	METAMORPHIC	0.667
2	METADIORITE, SHEARED	METAMORPHIC	0.667
2	METAPYROXENITE	METAMORPHIC	0.667
2	METATONALITE	METAMORPHIC	0.667
2	METAULTRAMAFIC-ROCK	METAMORPHIC	0.667
2	MICRO-ULTRAMAFIC-ROCK	METAMORPHIC	0.667
2	MIGMATITIC ROCK	METAMORPHIC	0.667
2	PEGMATITE, FOLIATED	METAMORPHIC	0.667
2	PEGMATITE, SHEARED	METAMORPHIC	0.667
2	QUARTZ-BIOTITE-ROCK	METAMORPHIC	0.667
2	QUARTZITE, BRECCIATED	METAMORPHIC	0.667
2	QUARTZITE, DOLOMITIC	METAMORPHIC	0.667
2	QUARTZITE, FELDSPATHIC	METAMORPHIC	0.667
2	QUARTZITE, FELDSPATHIC-GNEISSOSE	METAMORPHIC	0.667
2	QUARTZITE, GNEISSOSE	METAMORPHIC	0.667
2	QUARTZITE, HORNFELSED	METAMORPHIC	0.667
2	QUARTZITE, HORNFELSED-GNEISSOSE	METAMORPHIC	0.667
2	QUARTZITE, METALIMESTONE AND PHYLLITIC SEMIPELITE	METAMORPHIC	0.667
2	QUARTZITE, PEBBLY	METAMORPHIC	0.667
2	SERPENTINITE	METAMORPHIC	0.667
3	AMPHIBOLITE AND HORNBLENDE SCHIST	METAMORPHIC	0.714
3	BLASTOMYLONITE	METAMORPHIC	0.762
3	CALCSILICATE-ROCK	METAMORPHIC	0.762
3	CALCSILICATE-ROCK AND METAVOLCANICLASTIC IGNEOUS ROCKS	METAMORPHIC	0.762
3	CALCSILICATE-ROCK, GRANOFELSIC	METAMORPHIC	0.762
3	CALCSILICATE-ROCK, METALIMESTONE AND CALCAREOUS SEMIPELITE	METAMORPHIC	0.762
3	CALCSILICATE-ROCK, MYLONITIC	METAMORPHIC	0.762
3	CALCSILICATE-ROCK, SCHISTOSE	METAMORPHIC	0.762
3	CLINOPYROXENITE	METAMORPHIC	0.762
3	CLINOPYROXENITE, OLIVINE-CLINOPYROXENITE AND WEHRLITE	METAMORPHIC	0.762
3	FAYALITE-HEDENBERGITE-ROCK, MAGNETITE-RICH	METAMORPHIC	0.762
2	FELSITE, SHEARED	METAMORPHIC	0.762
3	HORNBLENDE-SCHIST AND AMPHIBOLITE	METAMORPHIC	0.762
2	MAGNETITITE	METAMORPHIC	0.762
2	META-ANORTHOSITE	METAMORPHIC	0.762
2	METABASALT	METAMORPHIC	0.762
2	METABASALT AND METAMICROGABBRO	METAMORPHIC	0.762
2	METABASALT, PHYLLITIC	METAMORPHIC	0.762
2	METAGABBRO AND HORNBLENDE SCHIST	METAMORPHIC	0.762
2	METAGABBRO AND METAMICROGABBRO	METAMORPHIC	0.762
2	METAGABBRO, GNEISSOSE	METAMORPHIC	0.762
2	METAGABBRO, SHEARED	METAMORPHIC	0.762
2	METAGABBROIC-ROCK	METAMORPHIC	0.762
2	METAGABBROIC-ROCK AND METAMICROGABBROIC-ROCK	METAMORPHIC	0.762
2	METAGABBROIC-ROCK AND ULTRAMAFIC-ROCK	METAMORPHIC	0.762
2	METAGABBROIC-ROCK, MAGNETIC	METAMORPHIC	0.762
2	METAGRANITE	METAMORPHIC	0.762
2	METAGRANITE, FOLIATED	METAMORPHIC	0.762
2	METAGRANITE, SHEARED	METAMORPHIC	0.762
2	METAGRANODIORITE	METAMORPHIC	0.762
2	METAGRANODIORITE, GNEISSOSE	METAMORPHIC	0.762
2	METAHARZBURGITE	METAMORPHIC	0.762
2	METAMELAGRANITE, FOLIATED-BIOTITE	METAMORPHIC	0.762
2	METAMICROGABBRO	METAMORPHIC	0.762
2	METAMICROGABBRO AND AMPHIBOLITE	METAMORPHIC	0.762
2	METAMICROGABBRO, FELDSPAR-PHYRIC	METAMORPHIC	0.762
2	METAMICROGABBRO, FOLIATED	METAMORPHIC	0.762
2	METAMICROGRANITE	METAMORPHIC	0.762
3	METAORTHOPYROXENITE	METAMORPHIC	0.762
2	MICRODIORITE, SHEARED	METAMORPHIC	0.762
2	MICROGRANITE, GNEISSOSE	METAMORPHIC	0.762
2	MICROGRANITE, SHEARED	METAMORPHIC	0.762
6	PELITE, SCHISTOSE, AND GNEISS	METAMORPHIC	0.762
2	QUARTZITE, CONGLOMERATE AND SANDSTONE	METAMORPHIC	0.762
2	QUARTZITE, PELITE AND PSAMMITE	METAMORPHIC	0.762
2	QUARTZITE, PSAMMITE AND SEMIPELITE	METAMORPHIC	0.762
2	QUARTZITE, PYRITIC	METAMORPHIC	0.762
2	QUARTZITE, SEMIPELITE AND PELITE	METAMORPHIC	0.762
3	SHEAR-BOUNDED METAMORPHIC ROCK SLICES FORMING TECTONIC MELANGE; QUARFF TYPE	METAMORPHIC	0.762
2	GRANITE, FOLIATED	METAMORPHIC	0.81
2	GRANITE, GNEISSOSE	METAMORPHIC	0.81
2	GRANITE, GNEISSOSE-AUGEN	METAMORPHIC	0.81
2.5	QUARTZITE AND PEBBLY PSAMMITE	METAMORPHIC	0.81
2.5	QUARTZITE AND PSAMMITE	METAMORPHIC	0.81
4	BRECCIA	METAMORPHIC	0.857
4	CALCAREOUS SCHIST, METADOLOSTONE AND METALIMESTONE	METAMORPHIC	0.857
3	CALCSILICATE-ROCK AND PSAMMITE	METAMORPHIC	0.857
3	METABASALTIC-ROCK	METAMORPHIC	0.857
3	METACARBONATE-ROCK	METAMORPHIC	0.857
3	METACARBONATE-ROCK AND CALCSILICATE-ROCK	METAMORPHIC	0.857
3	METACARBONATE-ROCK, MYLONITIC	METAMORPHIC	0.857
4	METADOLOMITE AND/OR DOLOMITIC METALIMESTONE	METAMORPHIC	0.857
3	METALAVA AND METATUFF	METAMORPHIC	0.857
3	METAMAFIC-ROCK	METAMORPHIC	0.857
3	METAMAFITE	METAMORPHIC	0.857
3	METAMELASYENITE	METAMORPHIC	0.857
2	METAQUARTZ-ARENITE	METAMORPHIC	0.857
2	METAQUARTZ-ARENITE AND SEMIPELITE	METAMORPHIC	0.857
4	MIGMATITIC PSAMMITE AND MIGMATITIC-MICACEOUS PSAMMITE	METAMORPHIC	0.857
2	MYLONITE, QUARTZOSE	METAMORPHIC	0.857
4	PARASCHIST	METAMORPHIC	0.857
4	SCHIST	METAMORPHIC	0.857
4	SCHIST, CHLORITE-EPIDOTE	METAMORPHIC	0.857
4	SCHIST, CLINOPYROXENE-GARNET-HORNBLENDE	METAMORPHIC	0.857
4	SCHIST, GARNET-HORNBLENDE	METAMORPHIC	0.857
4	SCHIST, GRAPHITIC	METAMORPHIC	0.857
4	SCHIST, HORNBLENDE	METAMORPHIC	0.857
4	SCHIST, MICA	METAMORPHIC	0.857
4	SCHIST, QUARTZ	METAMORPHIC	0.857
4	SCHIST, TREMOLITE	METAMORPHIC	0.857
4	SCHIST, TREMOLITE-MICROCLINE	METAMORPHIC	0.857
6	BANDED-SCHISTOSE PELITE AND BANDED-GNEISSOSE PELITE	METAMORPHIC	0.905
2.5	MICACEOUS PSAMMITE AND FELDSPATHIC QUARTZITE	METAMORPHIC	0.905
4.5	MIGMATITIC PSAMMITE WITH MIGMATITIC SEMIPELITE	METAMORPHIC	0.905
2.5	PSAMMITE AND GNEISSOSE PSAMMITE	METAMORPHIC	0.905
3	CALCAREOUS-BASALTIC METATUFF AND CALCAREOUS-BASALTIC METALAVA	METAMORPHIC	0.952
4	METABASALT, PSAMMITE AND PELITE	METAMORPHIC	0.952
2	METACHERT	METAMORPHIC	0.952
2	METADUNITE	METAMORPHIC	0.952
2	METAGABBRO	METAMORPHIC	0.952
4	METALEUCOSYENITE	METAMORPHIC	0.952
3	METATUFF	METAMORPHIC	0.952
3	METAVOLCANICLASTIC SEDIMENTARY ROCK	METAMORPHIC	0.952
3	METAVOLCANICLASTIC-IGNEOUS-ROCK	METAMORPHIC	0.952
2	PHYLLITIC-GRAPHITIC PELITE AND QUARTZITE	METAMORPHIC	0.952
3	PSEUDOTACHYLITE	METAMORPHIC	0.952
6	QUARTZITE AND CONGLOMERATE	METAMORPHIC	0.952
4	QUARTZITE AND GRAPHITIC PELITE	METAMORPHIC	0.952
4	QUARTZITE AND PELITE	METAMORPHIC	0.952
4	QUARTZITE AND SEMIPELITE	METAMORPHIC	0.952
4.5	CALCSILICATE-ROCK AND SEMIPELITE	METAMORPHIC	1
2.5	PSAMMITE AND AMPHIBOLITE	METAMORPHIC	1
2.5	PSAMMITE AND QUARTZITE	METAMORPHIC	1
3	BASALTIC METALAVA AND BASALTIC METATUFF	METAMORPHIC	1.048
3	CALCAREOUS PSAMMITE, CALCAREOUS SEMIPELITE AND CALCAREOUS PELITE	METAMORPHIC	1.048
3	CALCAREOUS SEMIPELITE AND MICACEOUS PSAMMITE	METAMORPHIC	1.048
3	CALCAREOUS SEMIPELITE, MICACEOUS PSAMMITE AND CALCSILICATE-ROCK	METAMORPHIC	1.048
3	GRAPHITIC PELITE AND SEMIPELITE	METAMORPHIC	1.048
3	GRAPHITIC PELITE, CALCAREOUS PELITE, CALCSILICATE-ROCK AND PSAMMITE	METAMORPHIC	1.048
3	GRAPHITIC PELITE, MARBLE AND PSAMMITE	METAMORPHIC	1.048
3	GRAPHITIC SEMIPELITE AND GRAPHITIC PELITE	METAMORPHIC	1.048
3	GRITTY PSAMMITE AND PELITE	METAMORPHIC	1.048
3	GRITTY PSAMMITE AND QUARTZITE	METAMORPHIC	1.048
3	HORNFELSED FOLIATED MICRODIORITE AND HORNFELSED FOLIATED PORPHYRITIC MICRODIORITE	METAMORPHIC	1.048
3	HORNFELSED METAGABBROIC-ROCK AND HORNFELSED METAMICROGABBROIC-ROCK	METAMORPHIC	1.048
3	HORNFELSED METASANDSTONE AND HORNFELSED METASILTSTONE	METAMORPHIC	1.048
3	HYPERSTHENE-BEARING METAGABBRO AND HYPERSTHENE-BEARING METAMICROGABBRO	METAMORPHIC	1.048
3	METANORITE	METAMORPHIC	1.048
6	MIGMATITIC PELITE AND MIGMATITIC SEMIPELITE	METAMORPHIC	1.048
4	MYLONITE	METAMORPHIC	1.048
4	MYLONITE, HORNFELSED	METAMORPHIC	1.048
4	MYLONITIC METALIMESTONE AND CALCAREOUS SCHIST	METAMORPHIC	1.048
3	PEBBLY PSAMMITE AND MICACEOUS PSAMMITE	METAMORPHIC	1.048
3	PHYLLONITE	METAMORPHIC	1.048
3	PROTOCATACLASITE	METAMORPHIC	1.048
3	PSAMMITE	METAMORPHIC	1.048
3	PSAMMITE AND CALCSILICATE-ROCK	METAMORPHIC	1.048
3	PSAMMITE AND MICACEOUS PSAMMITE	METAMORPHIC	1.048
3	PSAMMITE WITH SEMIPELITE AND PELITE	METAMORPHIC	1.048
3	PSAMMITE, DOLOMITIC	METAMORPHIC	1.048
3	PSAMMITE, EPIDOTIC	METAMORPHIC	1.048
3	PSAMMITE, FELDSPATHIC	METAMORPHIC	1.048
3	PSAMMITE, FELDSPATHIC-MIGMATITIC	METAMORPHIC	1.048
3	PSAMMITE, FOLIATED-GRITTY	METAMORPHIC	1.048
3	PSAMMITE, GNEISSOSE	METAMORPHIC	1.048
3	PSAMMITE, GNEISSOSE-MICACEOUS	METAMORPHIC	1.048
3	PSAMMITE, GRITTY	METAMORPHIC	1.048
3	PSAMMITE, GRITTY-CALCAREOUS	METAMORPHIC	1.048
3	PSAMMITE, HORNFELSED	METAMORPHIC	1.048
3	PSAMMITE, MICACEOUS	METAMORPHIC	1.048
3	PSAMMITE, MICACEOUS-FLAGGY	METAMORPHIC	1.048
3	PSAMMITE, MICACEOUS-PEBBLY	METAMORPHIC	1.048
3	PSAMMITE, MIGMATITIC	METAMORPHIC	1.048
3	PSAMMITE, PEBBLY	METAMORPHIC	1.048
3	PSAMMITE, PEBBLY-MIGMATITIC	METAMORPHIC	1.048
3	PSAMMITE, PELITE AND METALIMESTONE	METAMORPHIC	1.048
3	PSAMMITE, QUARTZITE AND SEMIPELITE	METAMORPHIC	1.048
3	PSAMMITE, QUARTZOSE	METAMORPHIC	1.048
3	PSAMMITE, QUARTZOSE-GNEISSOSE-MIGMATITIC	METAMORPHIC	1.048
3	PSAMMITE, SEMIPELITE AND CALCSILICATE-ROCK	METAMORPHIC	1.048
3	PSAMMITE, SEMIPELITE AND METAMICROGABBRO	METAMORPHIC	1.048
3	PSAMMITE, SEMIPELITE AND PELITE	METAMORPHIC	1.048
3	PSAMMITE. MYLONITIC	METAMORPHIC	1.048
4	SCHISTOSE SEMIPELITE, MICACEOUS PSAMMITE AND QUARTZITE	METAMORPHIC	1.048
3	SLATE	METAMORPHIC	1.048
3	VOLCANICLASTIC-BRECCIA	METAMORPHIC	1.048
3.5	SANDY METADOLOSTONE AND PSAMMITE	METAMORPHIC	1.095
3.5	SANDY METADOLOSTONE AND SCHISTOSE CALCSILICATE-ROCK	METAMORPHIC	1.095
4	AMPHIBOLITE, SEMIPELITE, PELITE AND PSAMMITE	METAMORPHIC	1.143
7	BRECCIA AND CONGLOMERATE	METAMORPHIC	1.143
4	CALCAREOUS PELITE, METALIMESTONE AND QUARTZITE	METAMORPHIC	1.143
4	DOLOMITIC LIMESTONE, PSAMMITE AND PELITE	METAMORPHIC	1.143
4	DOLOSTONE	METAMORPHIC	1.143
4	FELDSPATHIC QUARTZITE AND SEMIPELITE	METAMORPHIC	1.143
4	HORNFELSED-MICACEOUS PSAMMITE, HORNFELSED SEMIPELITE AND HORNFELSED PELITE	METAMORPHIC	1.143
4	LIMESTONE, DOLOMITIC	METAMORPHIC	1.143
4	METACONGLOMERATE	METAMORPHIC	1.143
4	METACONGLOMERATE AND METADIAMICTITE	METAMORPHIC	1.143
4	METACONGLOMERATE, HORNFELSED	METAMORPHIC	1.143
4	METACONGLOMERATE, SCHISTOSE	METAMORPHIC	1.143
4	METADIAMICTITE	METAMORPHIC	1.143
4	METADOLOSTONE	METAMORPHIC	1.143
4	METADOLOSTONE AND CALCSILICATE-ROCK	METAMORPHIC	1.143
4	METALIMESTONE	METAMORPHIC	1.143
4	METALIMESTONE AND CALCAREOUS SCHIST	METAMORPHIC	1.143
4	METALIMESTONE AND CALCSILICATE-ROCK	METAMORPHIC	1.143
4	METALIMESTONE AND DOLOSTONE	METAMORPHIC	1.143
4	METALIMESTONE WITH BANDS OF CALCSILICATE-ROCK	METAMORPHIC	1.143
4	METAMUDSTONE	METAMORPHIC	1.143
4	METAMUDSTONE AND METALIMESTONE	METAMORPHIC	1.143
4	METAMUDSTONE AND METASANDSTONE	METAMORPHIC	1.143
4	METASANDSTONE	METAMORPHIC	1.143
4	METASANDSTONE AND METACONGLOMERATE	METAMORPHIC	1.143
4	METASANDSTONE AND METAMUDSTONE	METAMORPHIC	1.143
4	METASEDIMENTARY ROCK	METAMORPHIC	1.143
4	METASEDIMENTARY ROCKS AND METAVOLCANICLASTIC ROCKS	METAMORPHIC	1.143
4	METASILTSTONE, HORNFELSED	METAMORPHIC	1.143
4	METAWACKE	METAMORPHIC	1.143
4	PELITE AND QUARTZITE	METAMORPHIC	1.143
4	PHYLLITIC SEMIPELITE, CALCSILICATE-ROCK AND METALIMESTONE	METAMORPHIC	1.143
6	QUARTZITE AND METACONGLOMERATE	METAMORPHIC	1.143
4	SANDSTONE, GRITTY	METAMORPHIC	1.143
4	SANDSTONE, HORNFELSED	METAMORPHIC	1.143
4	SEMIPELITE AND CALCSILICATE-ROCK	METAMORPHIC	1.143
4	SEMIPELITE AND QUARTZITE	METAMORPHIC	1.143
	ROCK	SEDIMENTARY AND IGNEOUS	1.143
4.5	CALCAREOUS PSAMMITE AND CALCAREOUS SEMIPELITE	METAMORPHIC	1.19
4.5	HORNFELSED PSAMMITE AND HORNFELSED MICACEOUS PSAMMITE	METAMORPHIC	1.19
4.5	HORNFELSED PSAMMITE AND HORNFELSED PELITE	METAMORPHIC	1.19
4.5	HORNFELSED PSAMMITE AND HORNFELSED SEMIPELITE	METAMORPHIC	1.19
4.5	PELITE AND CALCSILICATE-ROCK	METAMORPHIC	1.19
4.5	PELITE AND [SUBORDINATE] PSAMMITE	METAMORPHIC	1.19
4.5	PSAMMITE AND GRAPHITIC PELITE	METAMORPHIC	1.19
4.5	PSAMMITE AND LAMINATED SEMIPELITE	METAMORPHIC	1.19
4.5	PSAMMITE AND PELITE	METAMORPHIC	1.19
4.5	PSAMMITE AND PYRITIC SEMIPELITE	METAMORPHIC	1.19
4.5	PSAMMITE AND SEMIPELITE	METAMORPHIC	1.19
4.5	SEMIPELITE AND MICACEOUS PSAMMITE	METAMORPHIC	1.19
4.5	SEMIPELITE AND PSAMMITE	METAMORPHIC	1.19
5	DOLOMITIC METALIMESTONE AND SEMIPELITE	METAMORPHIC	1.238
5	METALIMESTONE AND PELITE	METAMORPHIC	1.238
5	METALIMESTONE, CALCSILICATE-ROCK, SEMIPELITE AND PELITE	METAMORPHIC	1.238
6	MICACEOUS PSAMMITE AND SEMIPELITE	METAMORPHIC	1.238
6	MICACEOUS PSAMMITE, SEMIPELITE AND CALCSILICATE-ROCK	METAMORPHIC	1.238
6	MICACEOUS PSAMMITE, SEMIPELITE AND PELITE	METAMORPHIC	1.238
5	PELITE AND [SUBORDINATE] METALIMESTONE	METAMORPHIC	1.238
5	SEMIPELITE AND DOLOSTONE	METAMORPHIC	1.238
5	SEMIPELITE AND METASANDSTONE	METAMORPHIC	1.238
6	BANDED PELITE AND BANDED SEMIPELITE	METAMORPHIC	1.333
6	CALCAREOUS PELITE AND SEMIPELITE	METAMORPHIC	1.333
6	HORNFELSED PELITE AND HORNFELSED SEMIPELITE	METAMORPHIC	1.333
6	PELITE	METAMORPHIC	1.333
6	PELITE AND SEMIPELITE	METAMORPHIC	1.333
6	PELITE, CALCAREOUS	METAMORPHIC	1.333
6	PELITE, GNEISSOSE	METAMORPHIC	1.333
6	PELITE, GNEISSOSE-MUSCOVITE-RICH	METAMORPHIC	1.333
6	PELITE, GRAPHITIC	METAMORPHIC	1.333
6	PELITE, HORNFELSED	METAMORPHIC	1.333
6	PELITE, MAGNETIC	METAMORPHIC	1.333
6	PELITE, MIGMATITIC	METAMORPHIC	1.333
6	PELITE, MUSCOVITE-RICH	METAMORPHIC	1.333
6	PELITE, PHYLLITIC	METAMORPHIC	1.333
6	PELITE, PHYLLITIC-GRAPHITIC	METAMORPHIC	1.333
6	PELITE, PHYLLITIC-MAGNETIC	METAMORPHIC	1.333
6	PELITE, SCHISTOSE	METAMORPHIC	1.333
6	PELITE, SCHISTOSE-GRAPHITIC	METAMORPHIC	1.333
6	PELITE, SEMIPELITE AND METALIMESTONE	METAMORPHIC	1.333
6	PELITE, SEMIPELITE AND PSAMMITE	METAMORPHIC	1.333
6	PELITE, SLATY	METAMORPHIC	1.333
6	PHYLLITIC SEMIPELITE AND QUARTZITE	METAMORPHIC	1.333
6	PHYLLITIC-GRAPHITIC PELITE AND PHYLLITIC-GRAPHITIC SEMIPELITE	METAMORPHIC	1.333
6	SEMIPELITE	METAMORPHIC	1.333
6	SEMIPELITE AND GRAPHITIC PELITE	METAMORPHIC	1.333
6	SEMIPELITE AND PELITE	METAMORPHIC	1.333
6	SEMIPELITE AND PELITE WITH METAMAFIC-ROCK	METAMORPHIC	1.333
6	SEMIPELITE AND SLATY PELITE	METAMORPHIC	1.333
6	SEMIPELITE, AMPHIBOLE	METAMORPHIC	1.333
6	SEMIPELITE, CALCAREOUS	METAMORPHIC	1.333
6	SEMIPELITE, CALCAREOUS, GARNET-BEARING	METAMORPHIC	1.333
6	SEMIPELITE, GARNET	METAMORPHIC	1.333
6	SEMIPELITE, GNEISSOSE	METAMORPHIC	1.333
6	SEMIPELITE, GRAPHITIC	METAMORPHIC	1.333
6	SEMIPELITE, HORNFELSED	METAMORPHIC	1.333
6	SEMIPELITE, METACARBONATE-ROCK AND CALCSILICATE-ROCK	METAMORPHIC	1.333
6	SEMIPELITE, MICACEOUS PSAMMITE AND PSAMMITE	METAMORPHIC	1.333
6	SEMIPELITE, MICACEOUS PSAMMITE, METALIMESTONE AND CALCSILICATE-ROCK	METAMORPHIC	1.333
6	SEMIPELITE, MIGMATITIC	METAMORPHIC	1.333
6	SEMIPELITE, PELITE AND CALCSILICATE-ROCK	METAMORPHIC	1.333
6	SEMIPELITE, PELITE AND PSAMMITE	METAMORPHIC	1.333
6	SEMIPELITE, PHYLLITIC	METAMORPHIC	1.333
6	SEMIPELITE, PSAMMITE AND METALIMESTONE	METAMORPHIC	1.333
6	SEMIPELITE, PSAMMITE AND PELITE	METAMORPHIC	1.333
6	SEMIPELITE, PSAMMITE AND QUARTZITE	METAMORPHIC	1.333
6	SEMIPELITE, QUARTZITE AND PELITE	METAMORPHIC	1.333
6	SEMIPELITE, SCHISTOSE	METAMORPHIC	1.333
6	SEMIPELITE, SCHISTOSE, AND PSAMMITE	METAMORPHIC	1.333
6	SEMIPELITE. PYRITIC	METAMORPHIC	1.333
2	QUARTZ (VEIN)	SEDIMENTARY	1.333
2	CHERT	SEDIMENTARY	1.333
2	QUARTZ-ARENITE	SEDIMENTARY	1.333
2	QUARTZITE	SEDIMENTARY	1.333
10	CATACLASITE	METAMORPHIC	1.429
3	MUDSTONE AND CHERT	SEDIMENTARY	1.429
3	SANDSTONE, CHERT AND LIMESTONE	SEDIMENTARY	1.429
3	SANDSTONE, CONGLOMERATE AND SILTSTONE	SEDIMENTARY	1.429
3	SANDSTONE, CONGLOMERATE AND [SUBORDINATE] ARGILLACEOUS ROCKS	SEDIMENTARY	1.429
3.5	BASALTIC LAVA AND SANDSTONE	SEDIMENTARY AND IGNEOUS	1.476
3.5	SEDIMENTARY ROCK AND LAVA	SEDIMENTARY AND IGNEOUS	1.476
4	ARGILLACEOUS ROCK, DOLOMITIC	SEDIMENTARY	1.524
4	ARGILLACEOUS ROCK, DOLOSTONE AND SANDSTONE	SEDIMENTARY	1.524
4	BAUXITE-CLAY	SEDIMENTARY	1.524
4	CALCAREOUS MUDSTONE AND LIMESTONE	SEDIMENTARY	1.524
4	CALCAREOUS SANDSTONE AND CALCAREOUS MUDSTONE WITH CONGLOMERATE	SEDIMENTARY	1.524
4	DOLOMITIC LIMESTONE AND ARGILLACEOUS ROCKS	SEDIMENTARY	1.524
4	DOLOMITIC LIMESTONE, MUDSTONE AND SANDSTONE	SEDIMENTARY	1.524
4	DOLOSTONE	SEDIMENTARY	1.524
4	DOLOSTONE AND CHERT	SEDIMENTARY	1.524
4	DOLOSTONE AND LIMESTONE	SEDIMENTARY	1.524
4	DOLOSTONE AND SANDSTONE	SEDIMENTARY	1.524
4	LIMESTONE	SEDIMENTARY	1.524
4	LIMESTONE AND CALCAREOUS SANDSTONE	SEDIMENTARY	1.524
4	LIMESTONE AND MUDSTONE, INTERBEDDED	SEDIMENTARY	1.524
4	LIMESTONE AND [SUBEQUAL/SUBORDINATE] ARGILLACEOUS ROCKS, INTERBEDDED	SEDIMENTARY	1.524
4	LIMESTONE AND [SUBEQUAL/SUBORDINATE] SANDSTONE, INTERBEDDED	SEDIMENTARY	1.524
4	LIMESTONE WITH SUBORDINATE SANDSTONE AND ARGILLACEOUS ROCKS	SEDIMENTARY	1.524
4	LIMESTONE, ARGILLACEOUS ROCKS AND SUBORDINATE SANDSTONE, INTERBEDDED	SEDIMENTARY	1.524
4	LIMESTONE, DOLOMITIC	SEDIMENTARY	1.524
4	LIMESTONE, MUDSTONE AND CALCAREOUS MUDSTONE	SEDIMENTARY	1.524
4	LIMESTONE, NODULAR (CORNSTONE)	SEDIMENTARY	1.524
4	LIMESTONE, SANDSTONE, SILTSTONE AND MUDSTONE	SEDIMENTARY	1.524
4	LIMESTONE, SANDY	SEDIMENTARY	1.524
4	LIMESTONE, SILICEOUS	SEDIMENTARY	1.524
4	LIMESTONE/CEMENTSTONE/CALCILUTITE, ARGILLACEOUS, MUDDY	SEDIMENTARY	1.524
4	MUDSTONE	SEDIMENTARY	1.524
4	MUDSTONE AND IRONSTONE	SEDIMENTARY	1.524
4	MUDSTONE AND LIMESTONE, INTERBEDDED	SEDIMENTARY	1.524
4	MUDSTONE AND SANDSTONE	SEDIMENTARY	1.524
4	MUDSTONE AND SANDSTONE, INTERBEDDED	SEDIMENTARY	1.524
4	MUDSTONE AND SANDSTONE, WITH SILTSTONE, DOLOSTONE AND LIMESTONE	SEDIMENTARY	1.524
4	MUDSTONE AND SILTSTONE	SEDIMENTARY	1.524
4	MUDSTONE AND [SUBEQUAL/SUBORDINATE] CONGLOMERATE	SEDIMENTARY	1.524
4	MUDSTONE WITH CHERT CLASTS	SEDIMENTARY	1.524
4	MUDSTONE WITH GYPSUM-STONE AND/OR ANHYDRITE-STONE	SEDIMENTARY	1.524
4	MUDSTONE WITH LIMESTONE NODULES	SEDIMENTARY	1.524
4	MUDSTONE, CALCAREOUS	SEDIMENTARY	1.524
4	MUDSTONE, CHERT AND LIMESTONE	SEDIMENTARY	1.524
4	MUDSTONE, CHERT AND SMECTITE-CLAYSTONE	SEDIMENTARY	1.524
4	MUDSTONE, LIMESTONE AND CALCAREOUS MUDSTONE	SEDIMENTARY	1.524
4	MUDSTONE, MANGANIFEROUS	SEDIMENTARY	1.524
4	MUDSTONE, SANDSTONE AND CONGLOMERATE	SEDIMENTARY	1.524
4	MUDSTONE, SANDSTONE AND LIMESTONE	SEDIMENTARY	1.524
4	MUDSTONE, SEATEARTH	SEDIMENTARY	1.524
4	MUDSTONE, SILTSTONE AND SANDSTONE	SEDIMENTARY	1.524
4	MUDSTONE, SILTSTONE, LIMESTONE AND SANDSTONE	SEDIMENTARY	1.524
4	MUDSTONE, SILTSTONE, SANDSTONE, COAL, IRONSTONE AND FERRICRETE	SEDIMENTARY	1.524
4	MUDSTONE, SILTY	SEDIMENTARY	1.524
4	PEBBLY SANDSTONE AND MUDSTONE, INTERBEDDED	SEDIMENTARY	1.524
4	PEBBLY SANDSTONE, MUDSTONE AND LIGNITE	SEDIMENTARY	1.524
4	SANDSTONE	SEDIMENTARY	1.524
4	SANDSTONE AND DOLOMITIC SILTSTONE	SEDIMENTARY	1.524
4	SANDSTONE AND MUDSTONE	SEDIMENTARY	1.524
4	SANDSTONE AND NODULAR LIMESTONE (CORNSTONE)	SEDIMENTARY	1.524
4	SANDSTONE AND SEATEARTH	SEDIMENTARY	1.524
4	SANDSTONE AND SEATEARTH SANDSTONE	SEDIMENTARY	1.524
4	SANDSTONE AND SILTSTONE, INTERBEDDED	SEDIMENTARY	1.524
4	SANDSTONE AND TUFFACEOUS-SANDSTONE	SEDIMENTARY	1.524
4	SANDSTONE AND [SUBEQUAL/SUBORDINATE] ARGILLACEOUS ROCKS, INTERBEDDED	SEDIMENTARY	1.524
4	SANDSTONE AND [SUBEQUAL/SUBORDINATE] LIMESTONE, INTERBEDDED	SEDIMENTARY	1.524
4	SANDSTONE WITH SUBORDINATE ARGILLACEOUS ROCKS AND LIMESTONE	SEDIMENTARY	1.524
4	SANDSTONE WITH SUBORDINATE CONGLOMERATE AND SILTSTONE	SEDIMENTARY	1.524
4	SANDSTONE WITH SUBORDINATE CONGLOMERATE, SILTSTONE AND MUDSTONE	SEDIMENTARY	1.524
4	SANDSTONE, CALCAREOUS	SEDIMENTARY	1.524
4	SANDSTONE, FERRUGINOUS	SEDIMENTARY	1.524
4	SANDSTONE, GLAUCONITIC	SEDIMENTARY	1.524
4	SANDSTONE, LIMESTONE, SILTSTONE AND CALCAREOUS MUDSTONE	SEDIMENTARY	1.524
4	SANDSTONE, MICACEOUS	SEDIMENTARY	1.524
4	SANDSTONE, MUDSTONE AND SILTSTONE	SEDIMENTARY	1.524
4	SANDSTONE, PEBBLY (GRAVELLY)	SEDIMENTARY	1.524
4	SANDSTONE, PEBBLY SANDSTONE, SEATEARTH AND SILTSTONE	SEDIMENTARY	1.524
4	SANDSTONE, SEATEARTH, SILTSTONE AND LIMESTONE	SEDIMENTARY	1.524
4	SANDSTONE, SILTSTONE AND DOLOMITIC LIMESTONE	SEDIMENTARY	1.524
4	SANDSTONE, SILTSTONE AND LIMESTONE	SEDIMENTARY	1.524
4	SANDSTONE, SILTSTONE AND MUDSTONE	SEDIMENTARY	1.524
4	SANDSTONE, SILTY	SEDIMENTARY	1.524
4	SANDSTONE, SILTY MUDSTONE AND CORNSTONE	SEDIMENTARY	1.524
4	SEDIMENTARY ROCK	SEDIMENTARY	1.524
4	SEDIMENTARY ROCK CYCLES, BORDER GROUP TYPE	SEDIMENTARY	1.524
4	SEDIMENTARY ROCK CYCLES, CLACKMANNAN GROUP TYPE	SEDIMENTARY	1.524
4	SEDIMENTARY ROCK CYCLES, COAL MEASURE TYPE	SEDIMENTARY	1.524
4	SEDIMENTARY ROCK CYCLES, STRATHCLYDE GROUP TYPE	SEDIMENTARY	1.524
4	SILTSTONE	SEDIMENTARY	1.524
4	SILTSTONE AND MUDSTONE, INTERBEDDED	SEDIMENTARY	1.524
4	SILTSTONE AND SANDSTONE	SEDIMENTARY	1.524
4	SILTSTONE, CALCAREOUS	SEDIMENTARY	1.524
4	SILTSTONE, CALCAREOUS MUDSTONE AND LIMESTONE CONCRETIONS OR NODULES	SEDIMENTARY	1.524
4	SILTSTONE, DOLOMITIC	SEDIMENTARY	1.524
4	SILTSTONE, MUDSTONE AND SANDSTONE	SEDIMENTARY	1.524
4	SLATE	SEDIMENTARY	1.524
4	SLUMPED AND FOLIATED MUDSTONE WITH CLASTS AND RAFTS OF EXOTIC ROCK	SEDIMENTARY	1.524
4	SLUMPED MUDSTONE, SLUMPED SILTSTONE AND SLUMPED SANDSTONE	SEDIMENTARY	1.524
4	WACKE	SEDIMENTARY	1.524
4	WACKE AND MUDSTONE	SEDIMENTARY	1.524
4	WACKE AND SILTSTONE	SEDIMENTARY	1.524
4	WACKE, SILTSTONE AND MUDSTONE	SEDIMENTARY	1.524
4	SERPENTINITE, CONGLOMERATE AND LIMESTONE	SEDIMENTARY AND IGNEOUS	1.524
4	TUFF AND VOLCANICLASTIC-SEDIMENTARY-ROCK	SEDIMENTARY AND IGNEOUS	1.524
4	VOLCANICLASTIC-MUDSTONE, VOLCANICLASTIC-SANDSTONE AND VOLCANICLASTIC-CONGLOMERATE	SEDIMENTARY AND IGNEOUS	1.524
4	VOLCANICLASTIC-SANDSTONE AND VOLCANICLASTIC-BRECCIA	SEDIMENTARY AND IGNEOUS	1.524
5.5	CONGLOMERATE, SANDSTONE, SILTSTONE AND MUDSTONE	SEDIMENTARY	1.667
5.5	SANDSTONE, MUDSTONE, SILTSTONE AND CONGLOMERATE	SEDIMENTARY	1.667
10	FAULT-GOUGE	METAMORPHIC	1.714
6	BRECCIA, SANDSTONE AND MUDSTONE	SEDIMENTARY	1.714
6	CONGLOMERATE, SANDSTONE AND SILTSTONE	SEDIMENTARY	1.714
6	SANDSTONE, PEBBLY SANDSTONE AND ANGULAR PEBBLE-GRADE CONGLOMERATE	SEDIMENTARY	1.714
6	SILTSTONE, SANDSTONE AND ANGULAR PEBBLE-GRADE CONGLOMERATE	SEDIMENTARY	1.714
7	BRECCIA AND SANDSTONE, INTERBEDDED	SEDIMENTARY	1.81
7	CONGLOMERATE AND WACKE	SEDIMENTARY	1.81
7	CONGLOMERATE AND [SUBEQUAL/SUBORDINATE] SANDSTONE, INTERBEDDED	SEDIMENTARY	1.81
7	FELDSPATHIC-ARENITE AND SILTSTONE	SEDIMENTARY	1.81
7	SANDSTONE AND ANGULAR PEBBLE-GRADE CONGLOMERATE	SEDIMENTARY	1.81
7	SANDSTONE AND CONGLOMERATE	SEDIMENTARY	1.81
7	SANDSTONE AND CONGLOMERATE, INTERBEDDED	SEDIMENTARY	1.81
7	SANDSTONE AND SUBORDINATE BRECCIA	SEDIMENTARY	1.81
7	SANDSTONE, MUDSTONE, CONGLOMERATE AND BRECCIA	SEDIMENTARY	1.81
10	CONGLOMERATE	METAMORPHIC	1.905
8	BRECCIA, CONGLOMERATE, SANDSTONE AND CORNSTONE	SEDIMENTARY	1.905
8	CONGLOMERATE, BRECCIA, TUFFACEOUS-SANDSTONE AND TUFFACEOUS-SILTSTONE	SEDIMENTARY	1.905
8	CONGLOMERATE, PEBBLY SANDSTONE, GRITTY SANDSTONE AND BRECCIA	SEDIMENTARY	1.905
8	SANDSTONE, BRECCIA AND CONGLOMERATE	SEDIMENTARY	1.905
10	BRECCIA	SEDIMENTARY	2.095
10	BRECCIA AND CONGLOMERATE	SEDIMENTARY	2.095
10	CLAY AND GRAVEL	SEDIMENTARY	2.095
10	CLAYSTONE, SILTSTONE AND FERRUGINOUS DOLOSTONE	SEDIMENTARY	2.095
10	COAL	SEDIMENTARY	2.095
10	CONGLOMERATE	SEDIMENTARY	2.095
10	CONGLOMERATE AND BRECCIA	SEDIMENTARY	2.095
10	CONGLOMERATE AND FELDSPATHIC-ARENITE	SEDIMENTARY	2.095
10	CONGLOMERATE, ANGULAR, PEBBLE-GRADE	SEDIMENTARY	2.095
10	FELDSPATHIC ARENITE AND CONGLOMERATE	SEDIMENTARY	2.095
10	FELDSPATHIC-ARENITE	SEDIMENTARY	2.095
10	SILCRETE, CONCRETIONARY	SEDIMENTARY	2.095
10	SILICATE-CONGLOMERATE, CALCITE-CEMENTED (CALCRETE)	SEDIMENTARY	2.095
10	TUFF	SEDIMENTARY	2.095
10	TUFFACEOUS-SANDSTONE	SEDIMENTARY	2.095
10	VOLCANICLASTIC-BRECCIA	SEDIMENTARY	2.095
10	VOLCANICLASTIC-CONGLOMERATE	SEDIMENTARY	2.095
10	VOLCANICLASTIC-IGNEOUS-ROCK	SEDIMENTARY	2.095
10	VOLCANICLASTIC-SANDSTONE	SEDIMENTARY	2.095
10	VOLCANICLASTIC-SANDSTONE AND VOLCANICLASTIC-CONGLOMERATE	SEDIMENTARY	2.095
10	VOLCANICLASTIC-SANDSTONE AND VOLCANICLASTIC-SILTSTONE	SEDIMENTARY	2.095
10	VOLCANICLASTIC-SEDIMENTARY-ROCK	SEDIMENTARY	2.095
10	VOLCANICLASTIC ROCKS (BOTH PYROCLASTIC & REWORKED VOLCANIC ROCKS)	SEDIMENTARY AND IGNEOUS	2.095
