# Supplementary material for: Investigating controls on fluvial grain sizes in post-glacial landscapes using citizen science
Source: Copernicus journal article supplement (doi:10.5194/esurf-14-95-2026), 2026-02-05
Supplement: Supplementary file [file esurf-14-95-2026-supplement-title-page.pdf › esurf-14-95-2026-supplement-title-page.pdf]

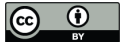

*Supplement of*

**Investigating controls on fluvial grain sizes in post-glacial landscapes using citizen science**

**Anya H. Towers et al.**

*Correspondence to:* Anya H. Towers (anyatowers3@gmail.com)

- esurf-14-95-2026-supplement-title-page.pdf
- ERDAS\_grainsize.csv
- PEBBLECOUNTS\_grainsize.csv
- Supplementary Data Table S3.xlsx
- Supplementary\_Data.pdf
- WOLMAN\_grainsize.csv

The copyright of individual parts of the supplement might differ from the article licence.
